# Supplementary material for: Management of Traumatic Nerve Palsies in Paediatric Supracondylar Humerus Fractures: A Systematic Review
Source: MDPI journal article supplement (doi:10.3390/children10121862), 2023-11-27
Supplement: s1 [file s1]

## **List of Supplementary Digital Content**

Supplementary S1: Search Strategies

Supplementary S2: PRISMA 2020 Checklist

Supplementary S3: JBI Critical Appraisal Checklist for Case Control studies

Supplementary S4: JBI Critical Appraisal Checklist for Cohort Studies

Supplementary S5: JBI Critical Appraisal Checklist for Case Series

Supplementary S6: JBI Critical Appraisal Checklist for Case Reports

Supplementary S7: Tables S1–S5
