# Supplementary material for: Management of Traumatic Nerve Palsies in Paediatric Supracondylar Humerus Fractures: A Systematic Review
Source: MDPI journal article supplement (doi:10.3390/children10121862), 2023-11-27
Supplement: s1 [file s1]

**Table S1.** All nerve palsies without intervention or investigation.

| PAPER                                     | No. of nerve palsies | No. of non-op | Outcomes of non op management |
|-------------------------------------------|----------------------|---------------|-------------------------------|
| Ababneh M et al. <sup>(11)</sup>          | 7                    | 7             | FR                            |
| Aronson DC et al. <sup>(12)</sup>         | 1                    | 1             | PR                            |
| Barrett KK et al <sup>(14)</sup>          | 35                   | 35            | FR                            |
| Boyd DW & Aronson DD. <sup>(16)</sup>     | 3                    | 3             | FR                            |
| Brown IC et al. <sup>(5)</sup>            | 14                   | 14            | FR                            |
| Campbell CC et al. <sup>(17)</sup>        | 25                   | 21            | FR                            |
| Cheng JC et al. <sup>(19)</sup>           | 19                   | 18            | FR                            |
| Culp RW et al. <sup>(20)</sup>            | 18                   | 9             | FR                            |
| Davis RT et al. <sup>(21)</sup>           | 10                   | 10            | 7 FR<br>3 PR                  |
| Devkota P et al. <sup>(22)</sup>          | 6                    | 6             | FR                            |
| Dormans JP et al. <sup>(23)</sup>         | 7                    | 7             | FR                            |
| Gosens T et al. <sup>(25)</sup>           | 34                   | 23            | FR                            |
| Horst M et al. <sup>(26)</sup>            | 2                    | 2             | FR                            |
| Ippolito E et al. <sup>(27)</sup>         | 14                   | 12            | FR                            |
| Jones ET et al. <sup>(28)</sup>           | 6                    | 6             | FR                            |
| Khademolhosseini M et al. <sup>(30)</sup> | 9                    | 5             | FR                            |
| Khan AQ et al. <sup>(31)</sup>            | 8                    | 8             | FR                            |
| Khan MY et al. <sup>(32)</sup>            | 25                   | 23            | FR                            |
| Kirz PH & Marsh HO <sup>(33)</sup>        | 11                   | 10            | FR                            |
| Kiyoshige Y et al. <sup>(34)</sup>        | 6                    | 6             | FR                            |
| Krusche-Mandl I et al. <sup>(35)</sup>    | 8                    | 7             | FR                            |
| Kuoppala E et al. <sup>(36)</sup>         | 1                    | 1             | FR                            |
| Larson AN et al. <sup>(38)</sup>          | 2                    | 2             | FR                            |
| Leonardi LL et al. <sup>(39)</sup>        | 3                    | 2             | FR                            |
| Li YA et al. <sup>(40)</sup>              | 7                    | 7             | FR                            |
| Louahem DM et al. <sup>(41)</sup>         | 66                   | 51            | FR                            |
| McGraw J. et al <sup>(45)</sup>           | 17                   | 13            | FR                            |
| Oh CW et al. <sup>(46)</sup>              | 4                    | 3             | FR                            |
| Silva M et al. <sup>(51)</sup>            | 11                   | 11            | FR                            |
| Solak S et al. <sup>(52)</sup>            | 6                    | 6             | FR                            |
| Tomaszewski et al. <sup>(56)</sup>        | 22                   | 20            | FR                            |
| van Vugt AB et al. <sup>(58)</sup>        | 23                   | 22            | FRx19<br>3 = 'bad'            |
| Yaokreh JB et al. <sup>(60)</sup>         | 8                    | 8             | FRx6<br>PRx2                  |

FR = full recovery, PR = partial recovery.

**Table S2.** Incomplete recovery at final follow up.

| No. of nerves (total) | Median  | Radial  | Ulnar   | Timing of investigation (EMG/NCS/US) | Timing of surgical exploration (months) | Findings at exploration                                                           | Outcome at last follow up | Last follow up   |
|-----------------------|---------|---------|---------|--------------------------------------|-----------------------------------------|-----------------------------------------------------------------------------------|---------------------------|------------------|
| 1 <sup>(12)</sup>     | 0       | 0       | 1       | N/A                                  | N/A                                     | N/A                                                                               | PR                        | 12 months        |
| 3 <sup>(15)</sup>     | 0       | 2       | 0       | N/A                                  | 6.8                                     | N/A                                                                               | PR                        | 16-24 months     |
| 9 <sup>(61)</sup>     | 3       | 2       | 4       | 3 and 5 months                       | 7.5                                     | 6 - fibrous scarring<br>2 - Entrapment<br>1 – lacerated (radial)                  | 8 FR<br>1 NR              | 25 months        |
| 1 <sup>(62)</sup>     | 0       | 0       | 1       | N/A                                  | at injury                               | Laceration (ulnar)                                                                | PR                        | 3 years          |
| 3 <sup>(63)</sup>     | 0       | 2       | 1       | N/A                                  | N/A                                     | N/A                                                                               | PR                        | 4 years          |
| 2 <sup>(27)</sup>     | 0       | 2       | 0       | 8 months and 1 year                  | 8                                       | Entrapped                                                                         | PR                        | 1 year, 11 years |
| 1 <sup>(64)</sup>     | 0       | 1       | 0       | N/A                                  | 4                                       | Lacerated (radial)                                                                | PR                        | 65 months        |
| 1 <sup>(65)</sup>     | 0       | 0       | 1       | 1 year                               | 2                                       | Entrapment in callous                                                             | PR                        | 1 year           |
| 2 <sup>(45)</sup>     | -       | 1       | 1       | N/A                                  | 6                                       | 1x lacerated (radial); other nerve not explored                                   | PR                        | 14 months        |
| 3 <sup>(66)</sup>     | 3       | 0       | 0       | N/A                                  | 3x at injury                            | Unclear                                                                           | PR<br>Lost to follow-up   | 6 months         |
| 3 <sup>(67)</sup>     | 1       | 1       | 1       | N/A                                  | 5 days                                  | Unclear                                                                           | PR                        | Unclear          |
| 1 <sup>(68)</sup>     | 1       | 0       | 0       | 11 months                            | 11                                      | Entrapment                                                                        | PR                        | 3 years          |
| 1 <sup>(69)</sup>     | 1       | 0       | 0       | 3 months                             | 3                                       | Entrapped in callous                                                              | PR                        | 4 months         |
| 2 <sup>(60)</sup>     | Unclear | Unclear | Unclear | N/A                                  | N/a                                     | n/a                                                                               | Unclear                   | Unclear          |
| 1 <sup>(70)</sup>     | 1       | 0       | 0       | 3-6 months                           | Unclear                                 | Entrapment                                                                        | PR                        | 1 year           |
| 1 <sup>(41)</sup>     | 0       | 1       | 0       | N/A                                  | At time of fracture and again 3 months  | Laceration; repaired<br>Subsequent re-rupture and nerve graft and tendon transfer | PR                        | 5 years          |

FR= full recovery; PR= partial recovery; NR= no recovery.

**Table S3.** Surgical Exploration at Primary Treatment.

|                                                    | <b>Number<br/>of<br/>nerves<br/>explored</b> | <b>Findings</b>                                                                                             | <b>Outcome</b>               | <b>Time<br/>to last<br/>follow<br/>up</b> |
|----------------------------------------------------|----------------------------------------------|-------------------------------------------------------------------------------------------------------------|------------------------------|-------------------------------------------|
| Ay, Akinci <sup>(13)</sup>                         | 9                                            | 3x median nerves<br>entrapped<br>6x radial nerves contused                                                  | FR                           | 3<br>month<br>s                           |
| Campbell,<br>Waters <sup>(17)</sup>                | 4                                            | In continuity                                                                                               | FR                           | 1 day -<br>10<br>month<br>s               |
| Chakrabarti and<br>Kunzru <sup>(18)</sup>          | 1                                            | Laceration (ulna)                                                                                           | PR                           | 3 years                                   |
| Cheng, Lam <sup>(19)</sup>                         | 1                                            | n/a                                                                                                         | FR                           | 4-40<br>weeks                             |
| Garg, Weller <sup>(1)</sup>                        | 1                                            | In continuity                                                                                               | FR                           | within<br>36<br>month<br>s                |
| Gosens and<br>Bongers <sup>(25)</sup>              | 11                                           | 10 in continuity                                                                                            | FR                           | within<br>6<br>month<br>s                 |
| Karlsson,<br>Thorsteinsson<br><sup>(29)</sup>      | 4                                            | Entrapped                                                                                                   | FR                           | 6.75<br>years<br>(range<br>6-9)           |
| Khademolhosseini,<br>Abd Rashid<br><sup>(30)</sup> | 4                                            | 1x Ulnar nerve -<br>entrapment; 1xmedian<br>nerve-contused; 1xradial<br>and 1xmedian nerve-in<br>continuity | FR 3.5<br>months<br>(mean)   | 8<br>month<br>s                           |
| Khan, Younas <sup>(32)</sup>                       | 2                                            | Entrapment                                                                                                  | FR                           | 3<br>month<br>s                           |
| Louahem,<br>Nebunescu <sup>(41)</sup>              | 11                                           | In continuity; 1xradial<br>nerve laceration                                                                 | FR except<br>radial<br>nerve | 3.3<br>month<br>s<br>(mean)               |
| Mangat, Martin<br><sup>(42)</sup>                  | 5                                            | Entrapment                                                                                                  | FR                           | 12<br>month<br>s                          |

|                                          |    |                                     |                                                                                             |               |
|------------------------------------------|----|-------------------------------------|---------------------------------------------------------------------------------------------|---------------|
| Marck, Kooiman <sup>(43)</sup>           | 2  | 1x Laceration (median), 1x contused | FR                                                                                          | 1.5 - 4 years |
| McGraw, Akbarnia <sup>(45)</sup>         | 2  | In continuity                       | FR                                                                                          | 2-3.5 months  |
| Oh, Park <sup>(46)</sup>                 | 1  | Entrapment                          | FR by 12 weeks                                                                              | 22 months     |
| Rasool and Naidoo <sup>(48)</sup>        | 27 | 5x In continuity, 22x contused      | 4x FR by day 3, ≤3 months in 15 patient, 3x not recovered by 6 months and lost to follow-up | 6 months      |
| Reigstad, Thorkildsen <sup>(49)</sup>    | 2  | Entrapped                           | FR                                                                                          | 6 months      |
| Steinman, Bastrom <sup>(53)</sup>        | 1  | Entrapped                           | FR                                                                                          | 36 weeks      |
| Tokutake, Okui <sup>(55)</sup>           | 1  | Entrapped                           | FR                                                                                          | 4 to 6 months |
| van Vugt, Severijnen <sup>(58)</sup>     | 1  | Complete laceration (median)        | FR                                                                                          | Unclear       |
| Tunku-Naziha, Wan-Yuhana <sup>(57)</sup> | 2  | In continuity                       | FR                                                                                          | 6 weeks       |

FR=full recovery; PR=partial recovery

**Table S4.** Delayed nerve explorations.

| No. of nerves     | Time to exploration (months) | Reason for exploration                    | Findings                              | Nerves involved                 | Investigation                                                | Surgery performed                                                     | Outcomes                                                          |
|-------------------|------------------------------|-------------------------------------------|---------------------------------------|---------------------------------|--------------------------------------------------------------|-----------------------------------------------------------------------|-------------------------------------------------------------------|
| 6 <sup>(15)</sup> | 6.7                          | Persistent deficits                       | 2 entrapped<br>4 lacerated            | Radial                          | n/a                                                          | Nerve grafting                                                        | 3 = Full recovery at 19 months; 3 = Partial recovery at 19 months |
| 9 <sup>(61)</sup> | 7.5                          | Persistent deficits                       | 8 entrapment<br>1 laceration (radial) | 2 radial<br>3 median<br>4 ulnar | EMG and NCS at 3 and 5 months                                | 8 neurolysis - all recovered; Lacerated radial nerve required a graft | 8= full recovery at 8 months<br>1 (graft) = tendon transfers      |
| 1 <sup>(27)</sup> | 8                            | Motor improvement to 3 months then static | Entrapped                             | Radial                          | EMG 6 months                                                 | Neurolysis                                                            | No change over 1 year                                             |
| 1 <sup>(64)</sup> | 4                            | Persistent deficits                       | Lacerated                             | Radial                          | N/A                                                          | Primary anastomosis                                                   | 65 months; motor returned but persistent sensation deficits       |
| 1 <sup>(35)</sup> | 2                            | Unclear                                   | Entrapped                             | Radial                          | n/a                                                          | Neurolysis                                                            | Full recovery 4 weeks after exploration (12 weeks post injury)    |
| 1 <sup>(69)</sup> | 3                            | Persistent deficits at 3 months           | Entrapped                             | Median                          | US and NCS; reduced action potentials and loss of continuity | Neurolysis                                                            | Improved function at 4 months                                     |
| 1 <sup>(65)</sup> | 2                            | Persistent deficits                       | Entrapped                             | Ulnar                           | EMG 1 year post exploration                                  | Division and Anastomosis                                              | 'Near complete recovery' at 1 year                                |

|                   |       |                                             |                                                    |                  |                     |                                                               |                                                                      |
|-------------------|-------|---------------------------------------------|----------------------------------------------------|------------------|---------------------|---------------------------------------------------------------|----------------------------------------------------------------------|
| 4 <sup>(41)</sup> | 3     | Persistent deficits at 8 weeks              | 3 ulnar nerves entrapped, 1 radial nerve lacerated | 3 ulnar 1 radial | EMG                 | Neurolysis, radial nerve grafted as primary repair had failed | Ulnar nerve complete recovery, radial persistent deficits            |
| 4 <sup>(42)</sup> | 0.5-1 | Circulatory impairment and sensory deficits | Entrapment in fracture site in 3                   | Median nerve     | n/a                 | Neurolysis                                                    | 3 = Full recovery at 12 months<br>1=incomplete recovery at 12 months |
| 1 <sup>(44)</sup> | 6     | Persistent deficits                         | Lacerated                                          | Radial           | EMG at 4 - 5 months | Neurolysis and sural nerve graft.                             | Full recovery by 1 year.                                             |
| 1 <sup>(45)</sup> | 6     | Persistent deficits                         | Lacerated                                          | Radial           | n/a                 | Primary repair                                                | Tendon transfers at 14 months                                        |
| 1 <sup>(47)</sup> | 6     | Persistent deficits and NCS abnormal        | Entrapment                                         | Median           | 6 months NCS        | Neurolysis                                                    | Full recovery at 2.5 years                                           |
| 1 <sup>(50)</sup> | 3     | Persistent deficits                         | Lacerated                                          | Radial           | n/a                 | Primary repair                                                | Full recovery at 5 months                                            |
| 1 <sup>(54)</sup> | 2.5   | Persistent deficits                         | Entrapment                                         | Median           | n/a                 | Resection and primary repair                                  | 'uneventful' full recovery at 10 years                               |
| 1 <sup>(55)</sup> | 3     | Persistent deficits                         | Entrapment                                         | Radial           | n/a                 | Neurolysis and sural nerve grafting                           | Full recovery by 6 months                                            |
| 2 <sup>(6)</sup>  | 1-2   | Unclear                                     | Entrapment                                         | Median and Ulnar | n/a                 | Neurolysis                                                    | Total group full recovery 122 days (mean)                            |
| 1 <sup>(68)</sup> | 11    | Persistent deficits                         | Entrapment                                         | Median           | 11 months EMG       | Neurolysis                                                    | Incomplete recovery at 2 years                                       |

NCS = nerve conduction studies, EMG = electromyography, US = ultrasound.

**Table S5.** Nerve lacerations.

| Number of nerves (Total)               | Type of paper | Nerve    | Time to exploration                 | Investigations (NCS/US/EMG)   | Surgery performed                                                                  | Outcome                | Time to last follow up | Pre or post reduction nerve palsy |
|----------------------------------------|---------------|----------|-------------------------------------|-------------------------------|------------------------------------------------------------------------------------|------------------------|------------------------|-----------------------------------|
| Chakrabarti and Kunzru <sup>(62)</sup> | RCS           | 1 ulnar  | Immediate                           | Nil                           | Primary nerve repair                                                               | PR                     | 3 years                | Pre reduction                     |
| Marck, Kooiman <sup>(43)</sup>         | CR            | 1 Median | Immediate (open fracture)           | Nil                           | Primary nerve repair                                                               | PR                     | 1.5 - 4 years          | Pre reduction                     |
| van Vugt, Severijne <sup>(58)</sup>    | RCS           | 1 median | ? 5 days - unclear                  | Nil                           | Primary nerve repair                                                               | FR                     | Unclear                | Pre reduction                     |
| Bertelli, Soldado <sup>(15)</sup>      | RCS           | 4 Radial | 6-9 months                          | Nil                           | Nerve graft                                                                        | 2x FR<br>2x PR         | 19 months              | No documentation                  |
| Culp, Osterman <sup>(20)</sup>         | RCS           | 1 Radial | 7.5 months                          | EMG and NCS at 3 and 5 months | Complete laceration and grafting                                                   | NR<br>Tendon transfers | 8 months               | No documentation                  |
| Kirz and Marsh <sup>(33)</sup>         | CS            | 1 Radial | 4 months                            | Nil                           | Complete laceration and primary repair                                             | PR                     | 65 months              | Post reduction                    |
| Louahem, Nebunescu <sup>(41)</sup>     | RCS           | 1 Radial | Immediate – repaired, then 4 months | EMG at 8 weeks                | Immediate primary repair then at 4 months nerve graft due to failed primary repair | NR<br>Tendon transfers | 5 years                | Pre reduction                     |
| Martin, Tolo <sup>(44)</sup>           | CR            | 1 Radial | 6 months                            | EMG at 4-5 months             | Complete laceration and nerve graft                                                | FR                     | 12 months              | Pre reduction                     |

|                                     |     |             |          |     |                                                 |                           |              |               |
|-------------------------------------|-----|-------------|----------|-----|-------------------------------------------------|---------------------------|--------------|---------------|
| McGraw,<br>Akbarnia <sup>(45)</sup> | RCS | 1<br>Radial | 6 months | Nil | Complete<br>laceration and<br>primary<br>repair | NR<br>Tendon<br>transfers | 14<br>months | Pre reduction |
| Sairyo,<br>Henmi <sup>(50)</sup>    | CR  | 1<br>Radial | 3 months | Nil | Complete<br>laceration and<br>primary<br>repair | FR                        | 5<br>months  | Pre reduction |

RCS = retrospective cohort study; CS = case series; CR = case report.

FR= full recovery; PR= partial recovery; NR = no recovery.
