# Supplementary material for: Management of Traumatic Nerve Palsies in Paediatric Supracondylar Humerus Fractures: A Systematic Review
Source: Children (Basel). 2023 Nov 27;10(12):1862. doi: 10.3390/children10121862 (PMC10741981; doi:10.3390/children10121862)
Supplement: Supplementary file 1 [file children-10-01862-s001.zip]

Archive with 8 entries (8 files):
- 20221115 Search strategies 2022 Supplementary S1.pdf
- 20230317 PRISMA CHECKLIST Supplementary S2.pdf
- Checklist_for_Case_Control_Studies Supplementary S3.pdf
- Checklist_for_Case_Reports Supplementary S4.pdf
- Checklist_for_Case_Series Supplementary S5.pdf
- Checklist_for_Cohort_Studies Supplementary S6.pdf
- List of Supplementary Digital Content.pdf
- Supplementary S7 Tables S1-S5.pdf
